# Supplementary material for: Peptides Bearing Multiple Post-Translational Modifications as Antigenic Targets for Severe Rheumatoid Arthritis Patients
Source: MDPI journal article supplement (doi:10.3390/ijms222413290), 2021-12-10
Supplement: s1 [file s1]

# Peptides Bearing Multiple Post-Translational Modifications as Antigenic Targets for Severe Rheumatoid Arthritis Patients.

Cristina García-Moreno <sup>1</sup>, María J. Gómara <sup>1</sup>, Raúl Castellanos-Moreira <sup>2</sup>, Raimon Sanmartí <sup>2</sup> and Isabel Haro <sup>1,\*</sup>

<sup>1</sup> Unit of Synthesis and Biomedical Applications of Peptides, Institute of Advanced Chemistry of Catalonia, Consejo Superior de Investigaciones Científicas (IQAC-CSIC), Jordi Girona 18-26, Barcelona 08034, Spain.

<sup>2</sup> Arthritis Unit, Rheumatology Department, Hospital Clinic of Barcelona, Villarroel 170, Barcelona 08036, Spain.

\* Correspondence: isabel.haro@iqac.csic.es

**Table S1.** Comparison of autoantibodies presenting erosive-RA (yes or not)

|                                              | <b>erosive<br/>(n=89)</b> | <b>non-<br/>erosive<br/>(n=89)</b> |
|----------------------------------------------|---------------------------|------------------------------------|
| <b>CFFCHP1</b>                               |                           |                                    |
| <b>anti-CFFCHP1-IgG positive (%)</b>         | 53 (59.6)                 | 51 (57.3)                          |
| <b>median titer anti-CFFCHP1 AU/mL (IQR)</b> | 54 (676)                  | 62 (307)                           |
| <b>anti-CFFCHP1-IgA positive (%)</b>         | 33 (37.1)                 | 31 (34.8)                          |
| <b>median titer anti-CFFCHP1 AU/mL (IQR)</b> | 8 (91)                    | 4 (41)                             |
| <b>anti-CFFCHP1-IgM positive (%)</b>         | 20 (22.5)                 | 17 (19.1)                          |
| <b>median titer anti-CFFCHP1 AU/mL (IQR)</b> | 0 (43)                    | 0 (35)                             |
| <b>CFFCHP2</b>                               |                           |                                    |
| <b>anti-CFFCHP2-IgG positive (%)</b>         | 52 (58.4)                 | 50 (56.2)                          |
| <b>median titer anti-CFFCHP2 AU/mL (IQR)</b> | 42 (769)                  | 74 (403)                           |
| <b>anti-CFFCHP2-IgA positive (%)</b>         | 35 (39.3)                 | 35 (39.3)                          |
| <b>median titer anti-CFFCHP2 AU/mL (IQR)</b> | 10 (90)                   | 12 (43)                            |
| <b>anti-CFFCHP2-IgM positive (%)</b>         | 23 (25.8)                 | 18 (20.2)                          |
| <b>median titer anti-CFFCHP2 AU/mL (IQR)</b> | 0 (79)                    | 0 (39)                             |
| <b>CFFCHP3</b>                               |                           |                                    |
| <b>anti-CFFCHP3-IgG positive (%)</b>         | 52 (58.4)                 | 50 (56.2)                          |
| <b>median titer anti-CFFCHP3 AU/mL (IQR)</b> | 67 (727)                  | 70 (417)                           |
| <b>anti-CFFCHP3-IgA positive (%)</b>         | 30 (33.7)                 | 34 (38.2)                          |
| <b>median titer anti-CFFCHP3 AU/mL (IQR)</b> | 18 (94)                   | 18 (39)                            |
| <b>anti-CFFCHP3-IgM positive (%)</b>         | 23 (25.8)                 | 18 (20.2)                          |
| <b>median titer anti-CFFCHP3 AU/mL (IQR)</b> | 0 (86)                    | 0 (54)                             |
| <b>CFFCHAP</b>                               |                           |                                    |
| <b>anti-CFFCHP3-IgG positive (%)</b>         | 47 (52.8)                 | 48 (53.9)                          |
| <b>median titer anti-CFFCHP3 AU/mL (IQR)</b> | 30 (796)                  | 31 (173)                           |
| <b>anti-CFFCHP3-IgA positive (%)</b>         | 31 (34.8)                 | 27 (30.3)                          |
| <b>median titer anti-CFFCHP3 AU/mL (IQR)</b> | 11 (48)                   | 0 (33)                             |
| <b>anti-CFFCHP3-IgM positive (%)</b>         | 20 (22.5)                 | 21 (23.6)                          |
| <b>median titer anti-CFFCHP3 AU/mL (IQR)</b> | 0 (37)                    | 0 (26)                             |

The differences were not significative

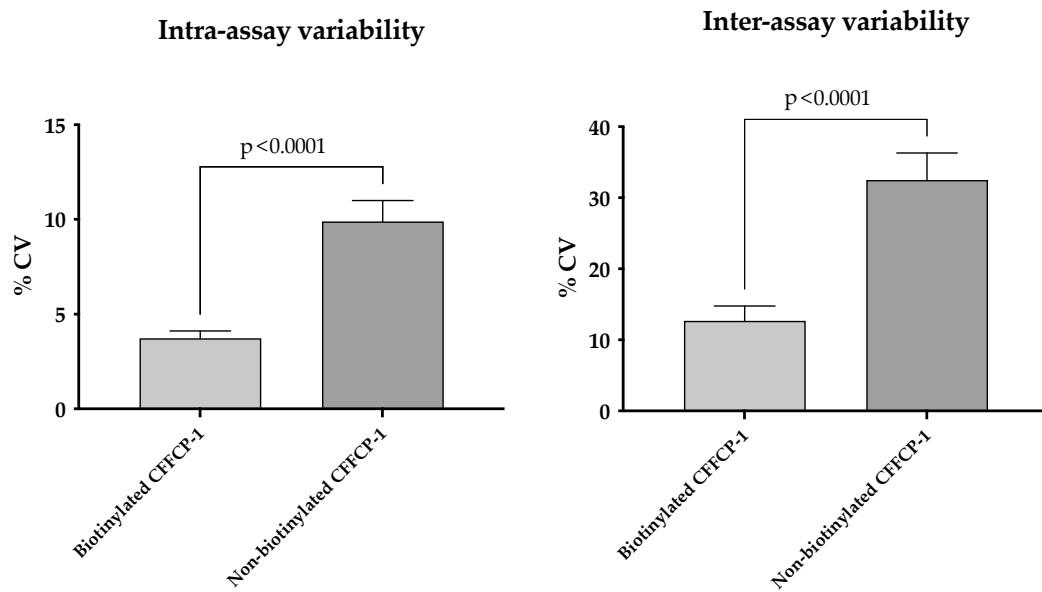

**Figure S1.** Intra-assay and inter-assay variability for biotinylated and non-biotinylated CFFCP1 peptide.
